# Supplementary material for: Synthesis of Nucleoside-like Molecules from a Pyrolysis Product of Cellulose and Their Computational Prediction as Potential SARS-CoV-2 RNA-Dependent RNA Polymerase Inhibitors
Source: MDPI journal article supplement (doi:10.3390/ijms23010518), 2022-01-04
Supplement: s1 [file s1]

# Supplementary Material

## Synthesis of nucleoside-like molecules from a pyrolysis product of cellulose and their computational prediction as SARS-CoV-2 RNA-dependent RNA polymerase inhibitors

Andrea Defant <sup>1,\*</sup>, Federico Dosi <sup>1</sup>, Nicole Innocenti <sup>1</sup> and Ines Mancini <sup>1,\*</sup>

<sup>1</sup> Università di Trento, Dipartimento di Fisica, Laboratorio di Chimica Bioorganica, via Sommarive 14, 38123, Povo, Trento, Italy

\* Correspondence: [ines.mancini@unitn.it](mailto:ines.mancini@unitn.it); Tel.: +39-0461-281-548; [andrea.defant@unitn.it](mailto:andrea.defant@unitn.it)

### Table of Contents

**Figure S1.** <sup>1</sup>HNMR (400MHz) and <sup>13</sup>CNMR (100MHz) spectra of compound **5** in CDCl<sub>3</sub>.

**Figure S2.** <sup>1</sup>HNMR (400MHz) and <sup>13</sup>CNMR (100MHz) spectra of compound **6** in CDCl<sub>3</sub>.

**Figure S3.** <sup>1</sup>HNMR (400MHz) and <sup>13</sup>CNMR (100MHz) spectra of compound **7** in CDCl<sub>3</sub>.

**Figure S4.** <sup>1</sup>HNMR (400MHz) and <sup>13</sup>CNMR (100MHz) spectra of compound **8** in CDCl<sub>3</sub>.

**Figure S5.** <sup>1</sup>HNMR (400MHz) and <sup>13</sup>CNMR (100MHz) spectra of compound **9** in CDCl<sub>3</sub>.

**Figure S6.** <sup>1</sup>HNMR (400MHz) and <sup>13</sup>CNMR (100MHz) spectra of compound **10** in CDCl<sub>3</sub>.

**Figure S7.** <sup>1</sup>HNMR (400MHz) and <sup>13</sup>CNMR (100MHz) spectra of compound **11** in acetone-d<sub>6</sub>.

**Figure S8.** Chemical structure and bioavailability radar for compounds **5-11**, remdesivir and GS-441524 evaluated by Swiss-ADME.

**Figure S9.** Drug-likeness prediction by Molsoft server (<https://molsoft.com/mprop/>)

**Figure S10.** Two-dimensional representations for the interactions of compounds **5** and **7-11** linked to RNA in the receptor pocket of free RdRp (7BV2), as deduced by docking calculation.

**Figure S11.** Data from MD simulation: (a) total potential energy of the system during the time and (b) quality Z-score of structure for free RdRp on the left, compound **6** at the center and GS-441524 on the right.

**Figure S12.** Data from MD simulation: (a) radius of gyration (in Å) during all simulation time and (b) RMSD (in Å) from the starting structure (Cα in blu, backbone in red and all heavy atoms in green) for free RdRp on the left, compound **6** at the center and GS-441524 on the right.

**Table S1.** ADME Prediction of compounds **5-11** and reference compounds remdesivir and GS-441524 evaluated by on-line Server Swiss-ADME (<http://www.swissadme.ch/>).

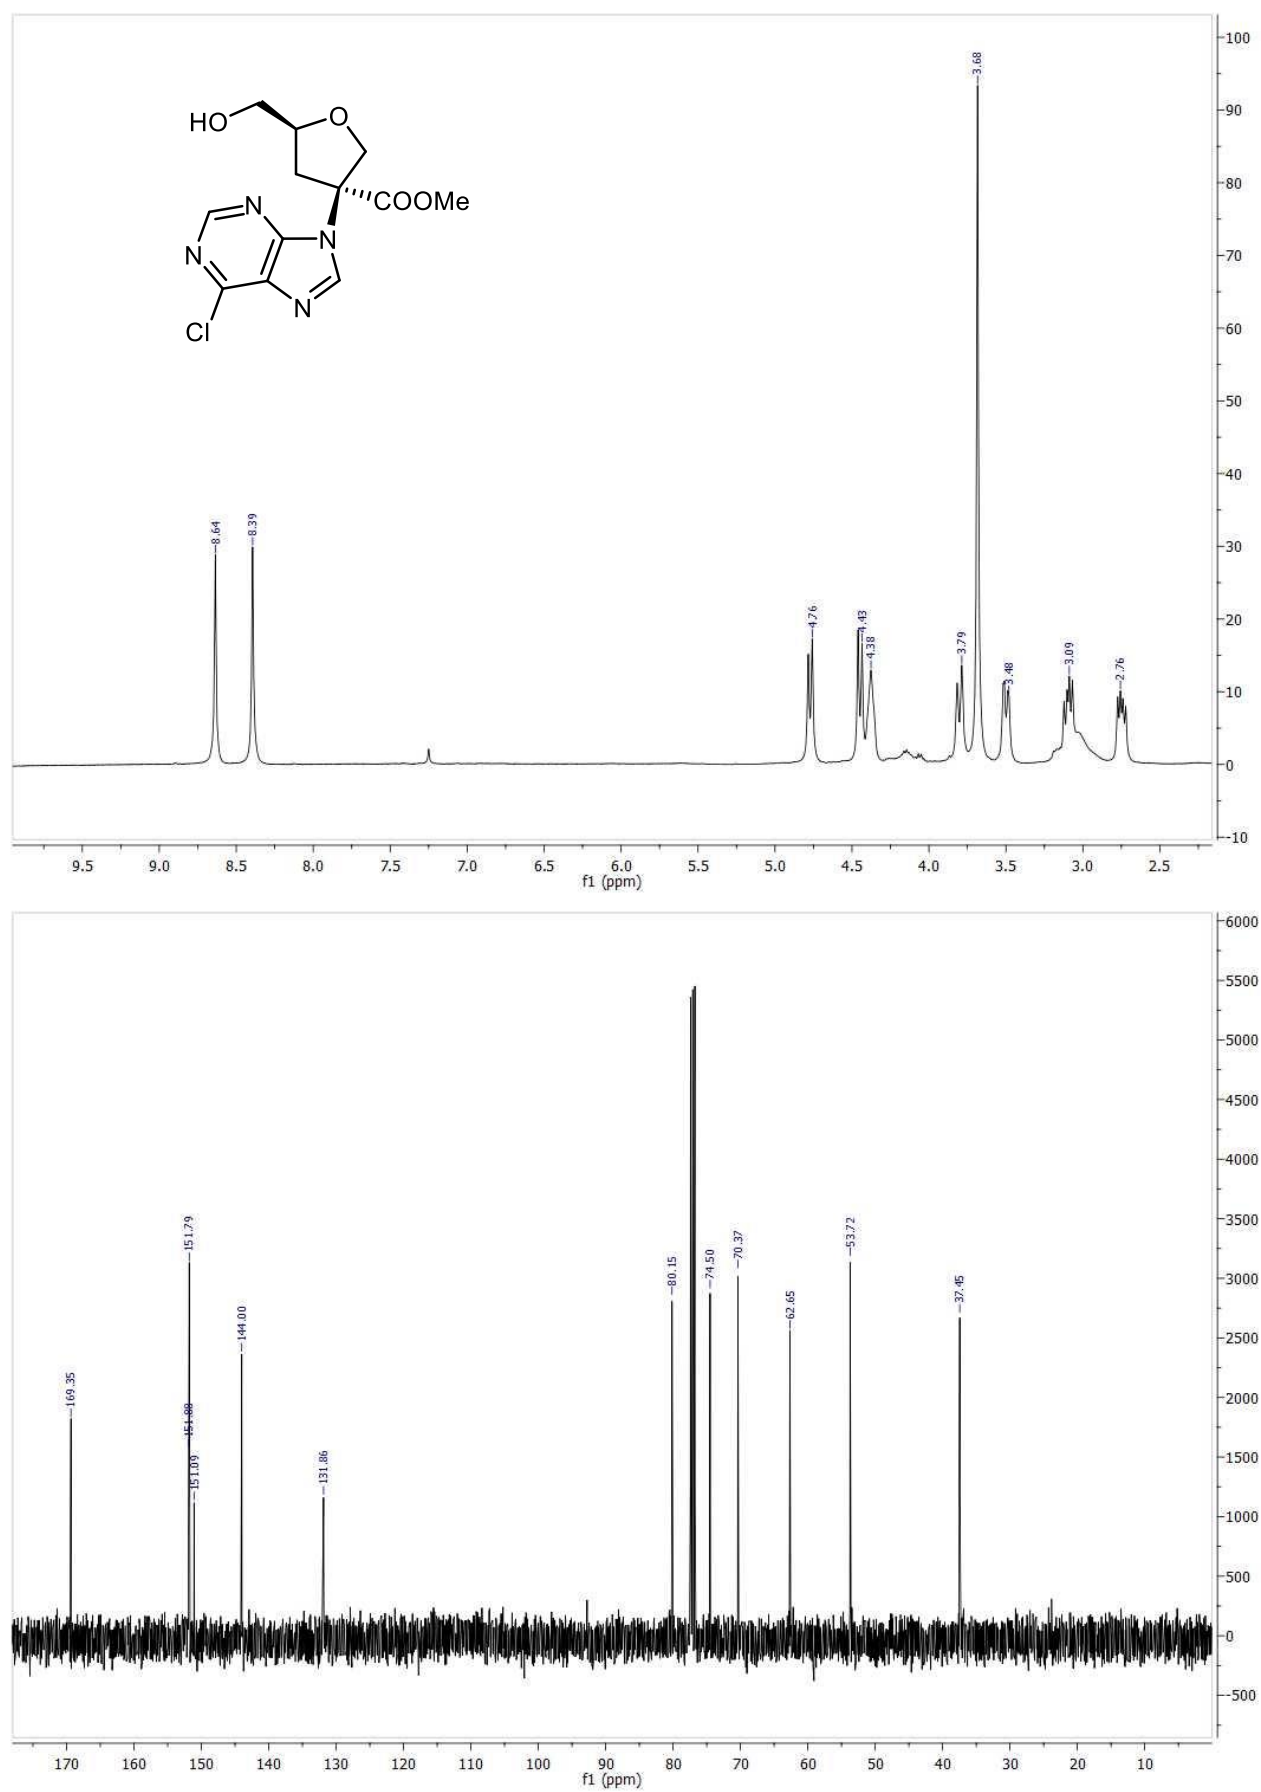

**Figure S1.** <sup>1</sup>H NMR (400 MHz) and <sup>13</sup>C NMR (100 MHz) spectra of compound 5 in CDCl<sub>3</sub>.

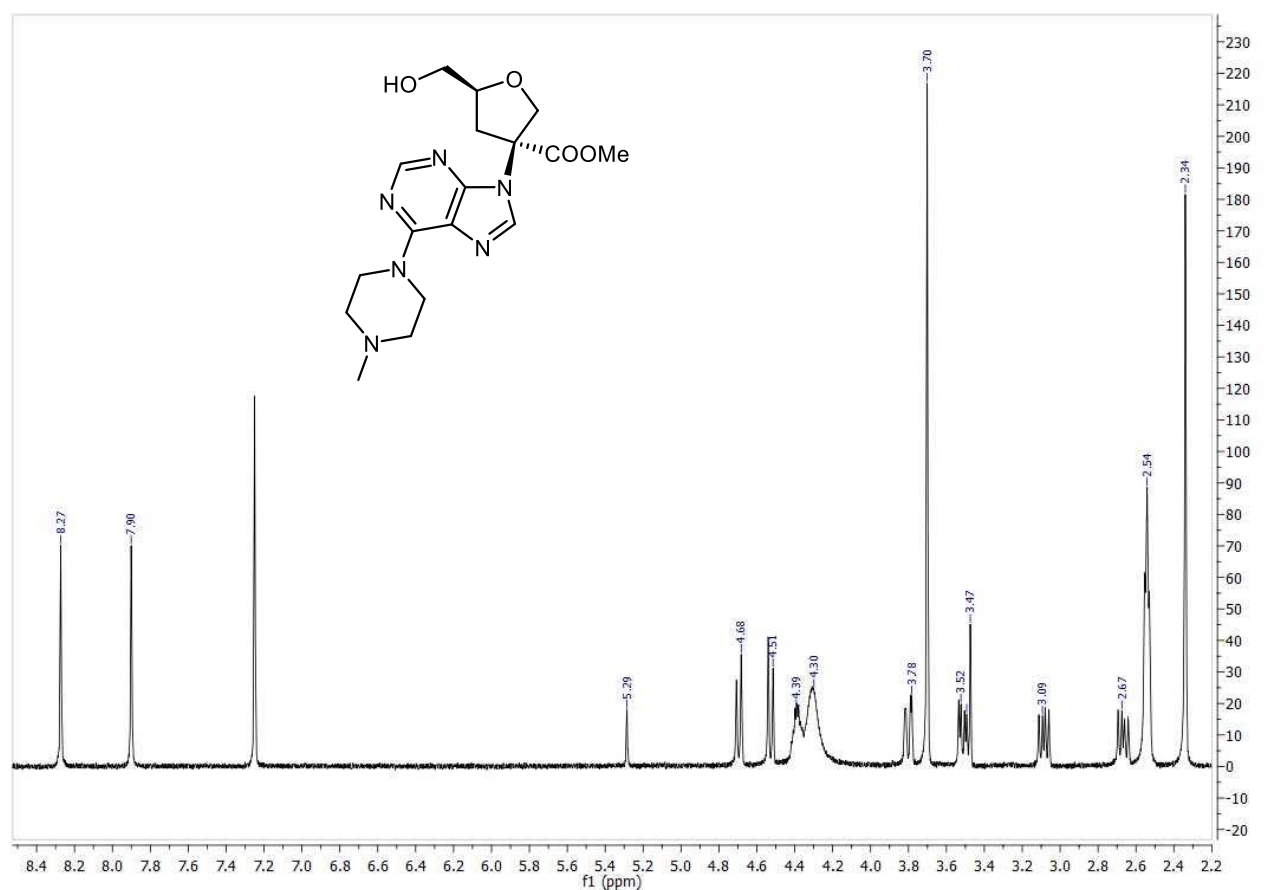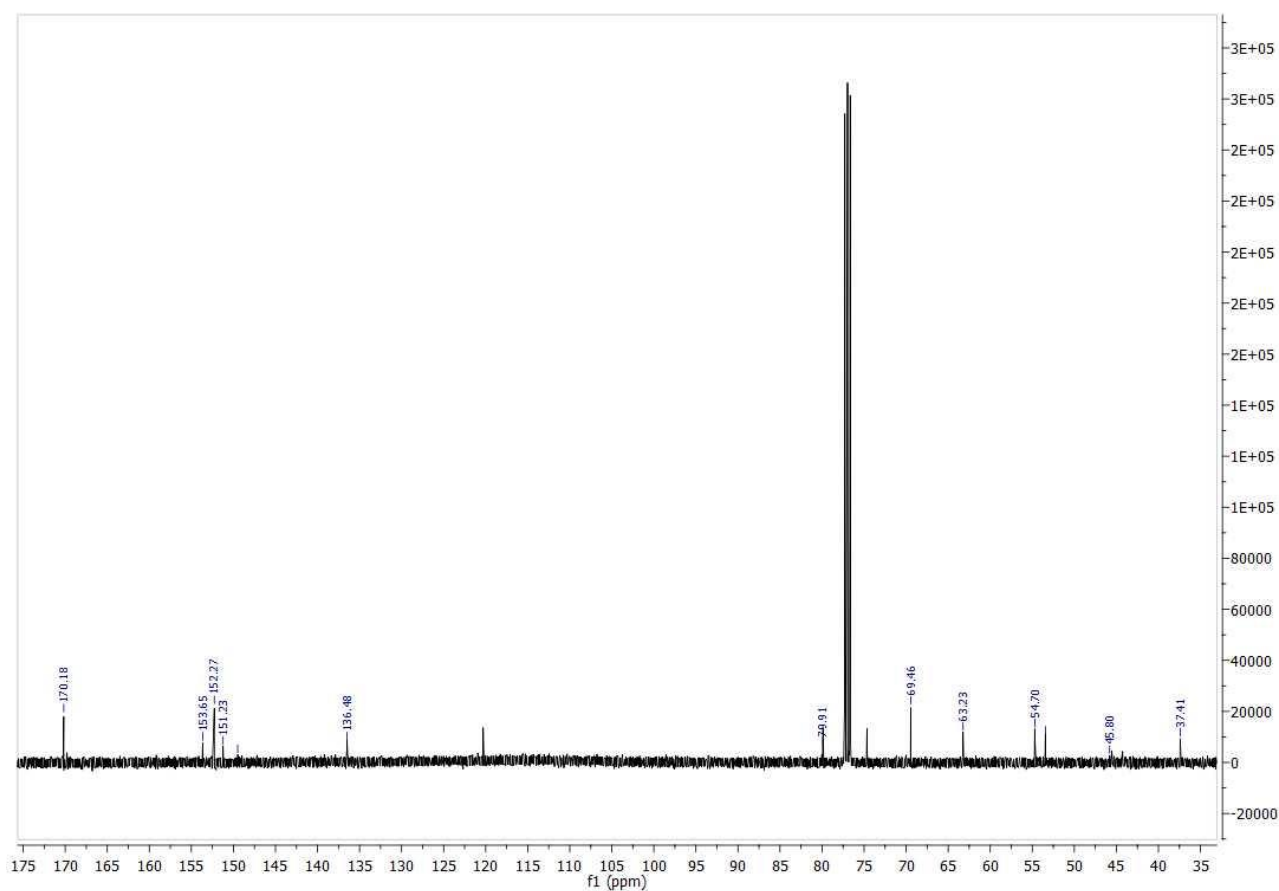

**Figure S2.** <sup>1</sup>H NMR (400 MHz) and <sup>13</sup>C NMR (100 MHz) spectra of compound 6 in CDCl<sub>3</sub>.

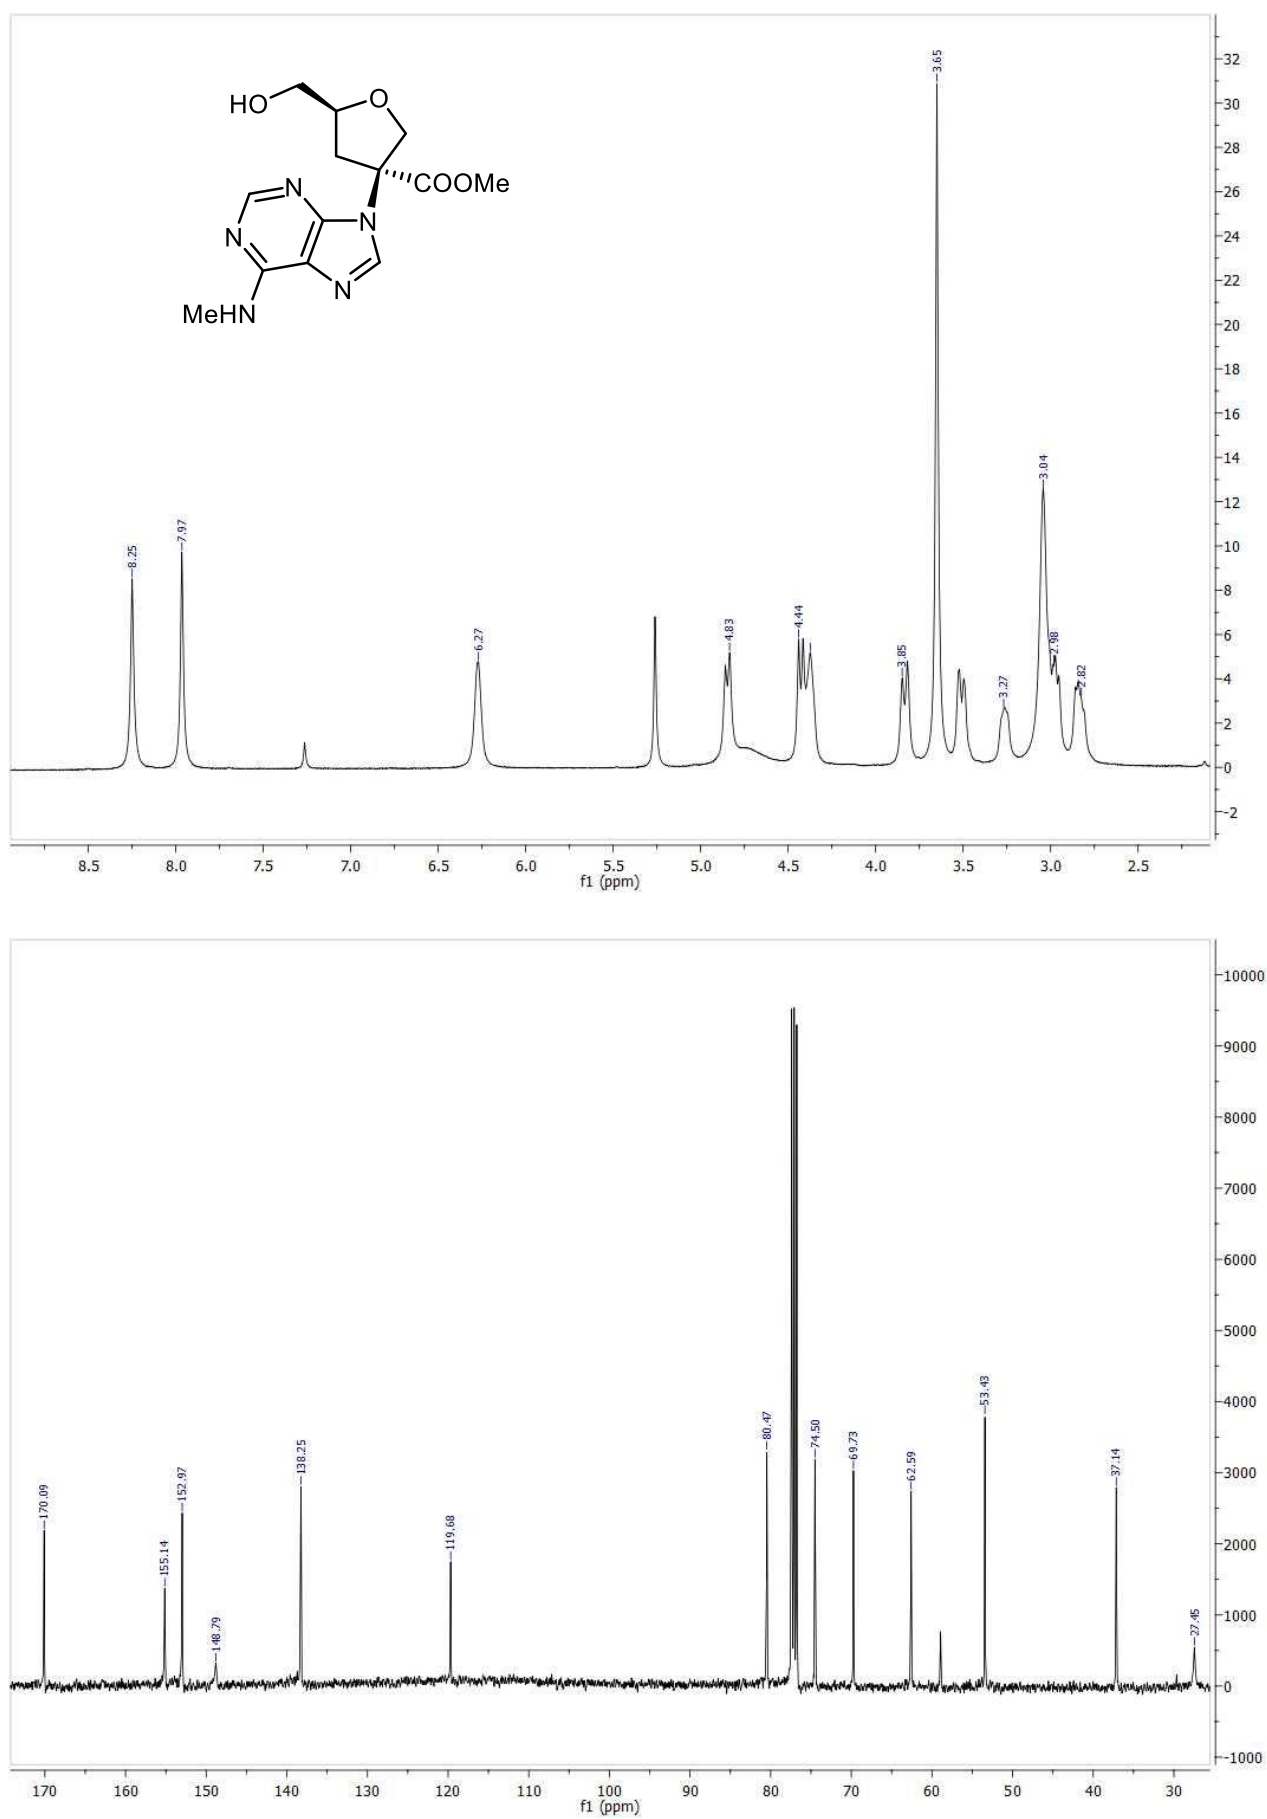

**Figure S3.** <sup>1</sup>H NMR (400 MHz) and <sup>13</sup>C NMR (100 MHz) spectra of compound 7 in CDCl<sub>3</sub>.

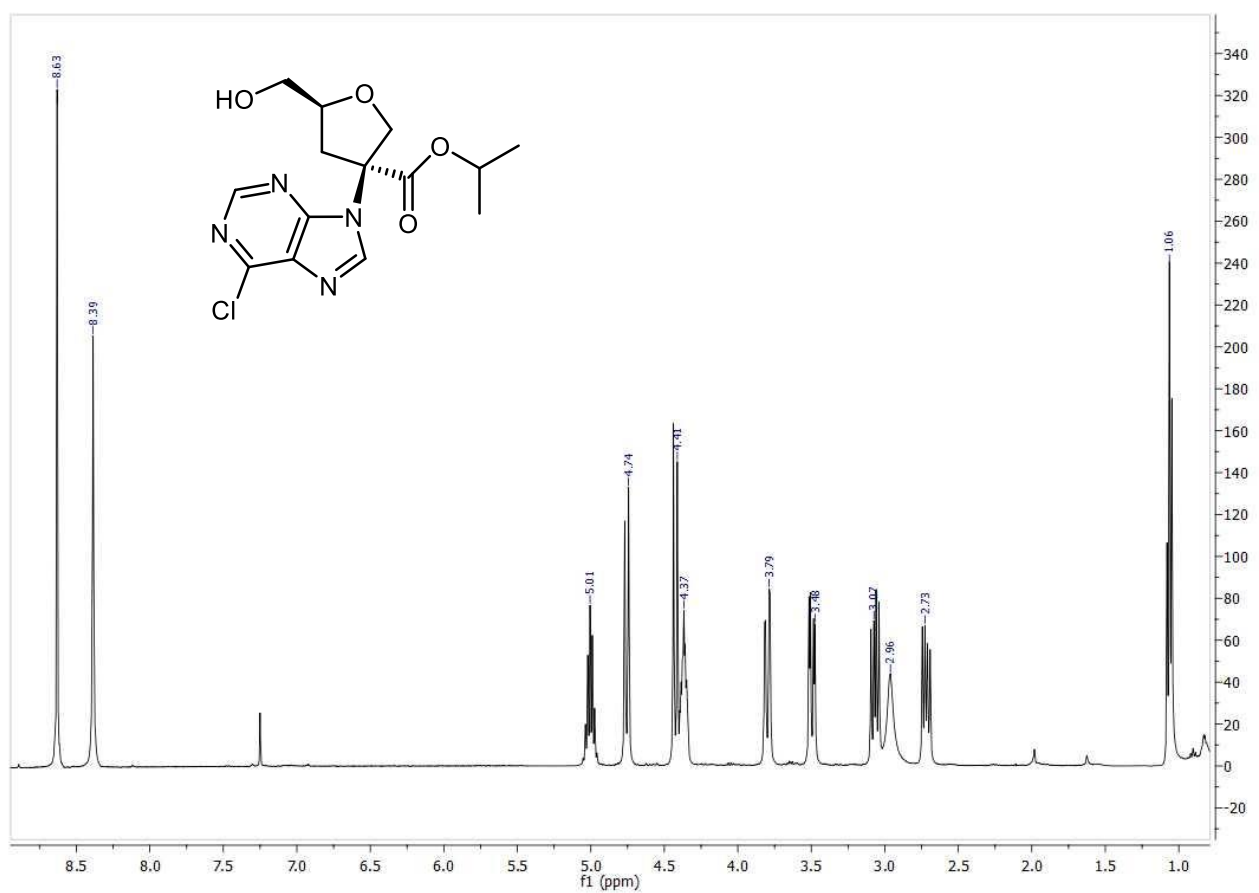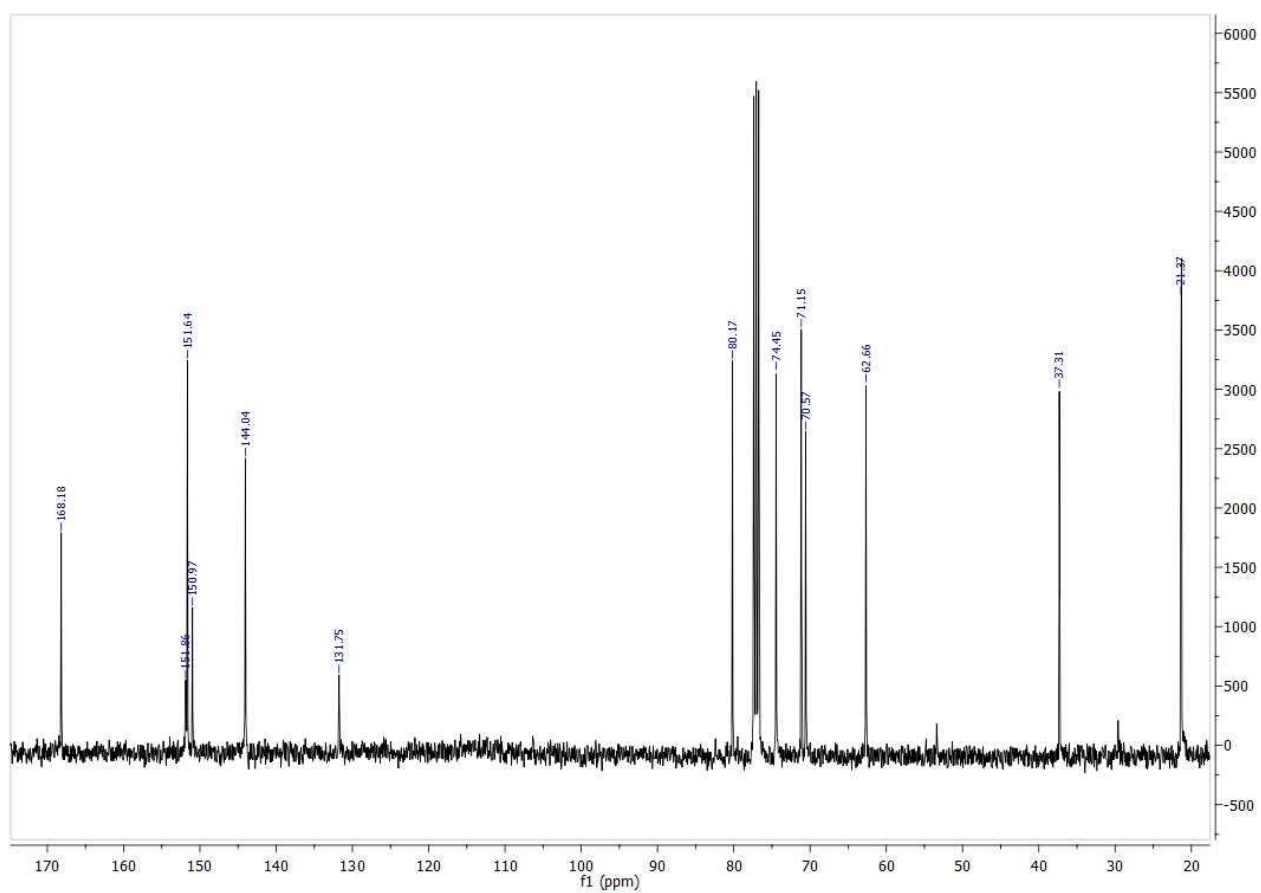

**Figure S4.** <sup>1</sup>H NMR (400 MHz) and <sup>13</sup>C NMR (100 MHz) spectra of compound 8 in CDCl<sub>3</sub>.

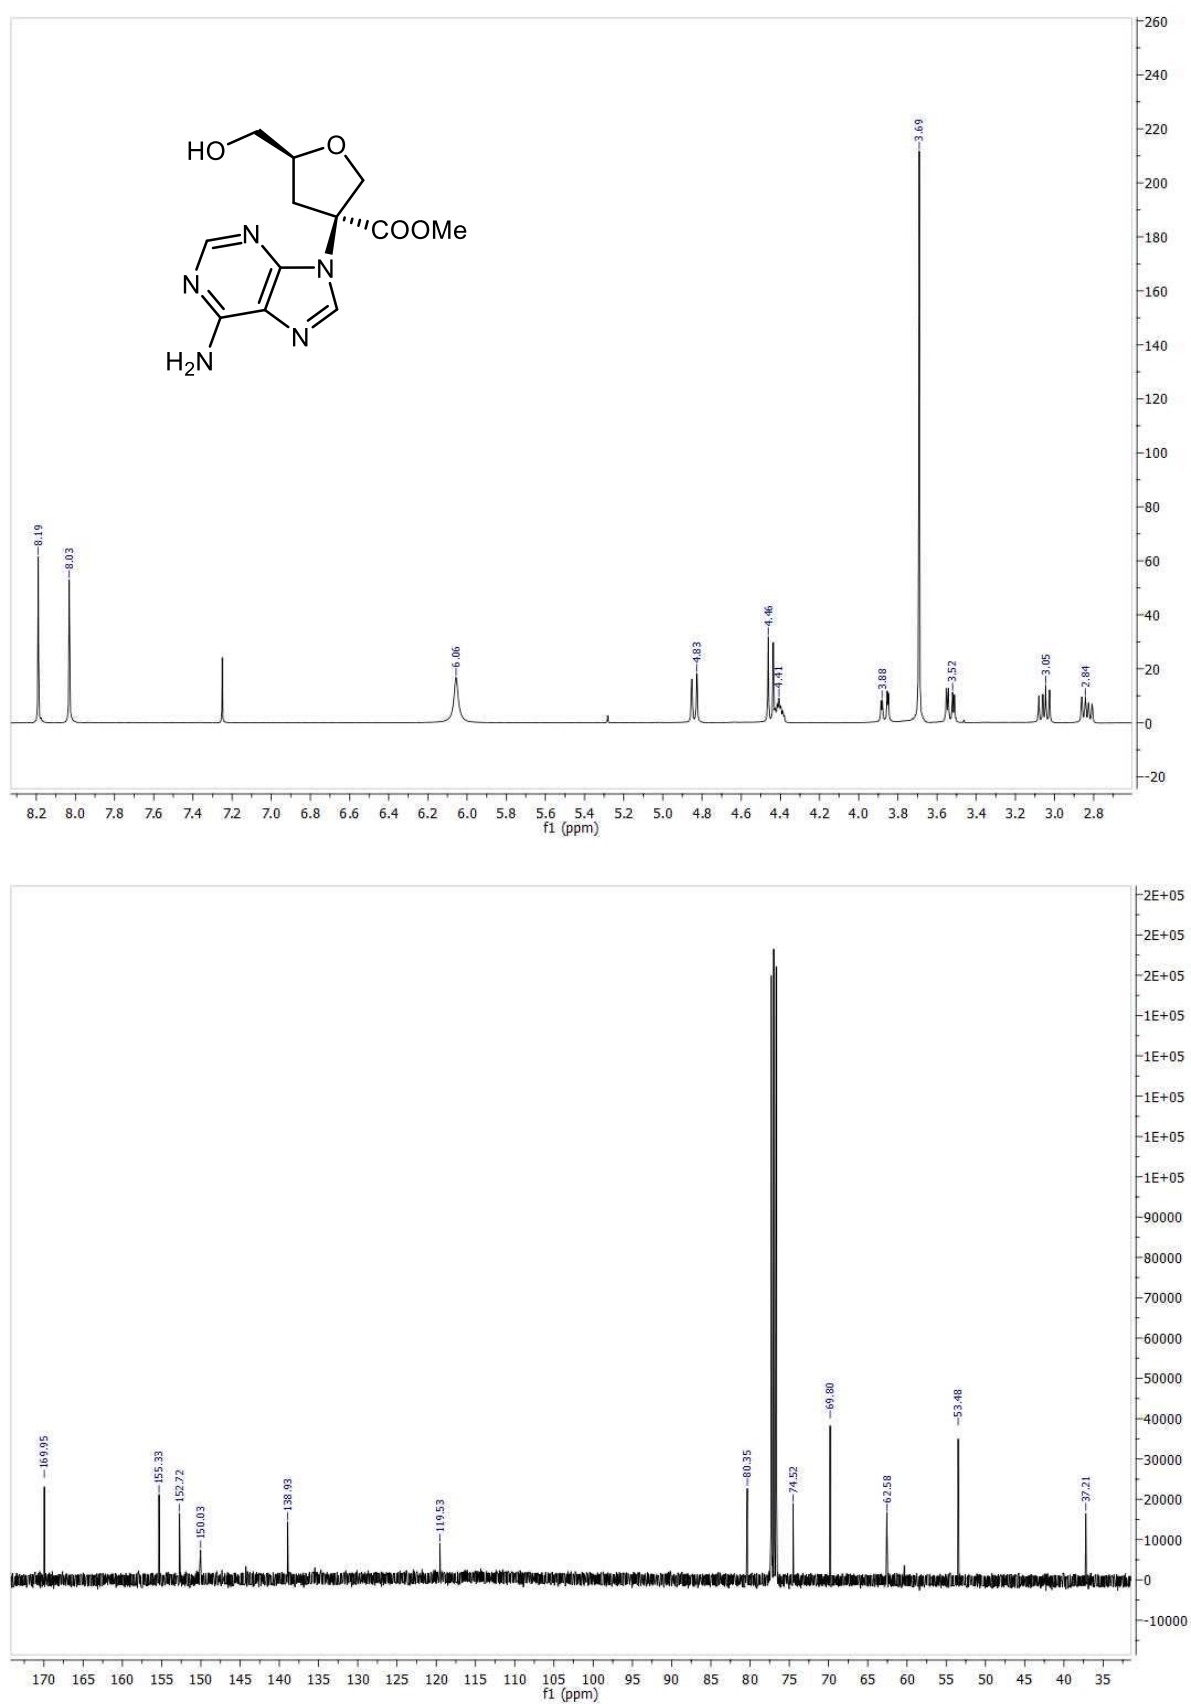

Figure S5. <sup>1</sup>H NMR (400 MHz) and <sup>13</sup>C NMR (100 MHz) spectra of compound 9 in CDCl<sub>3</sub>.

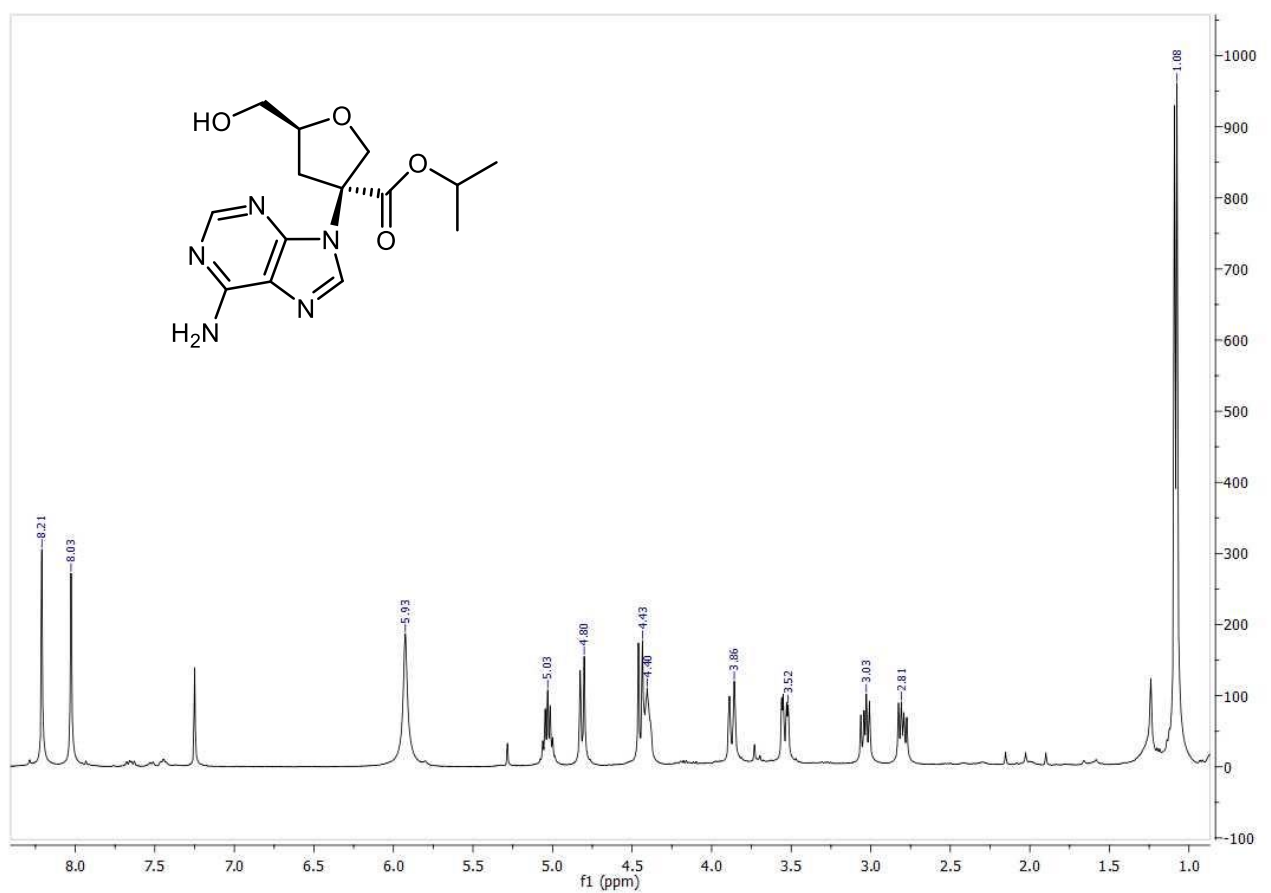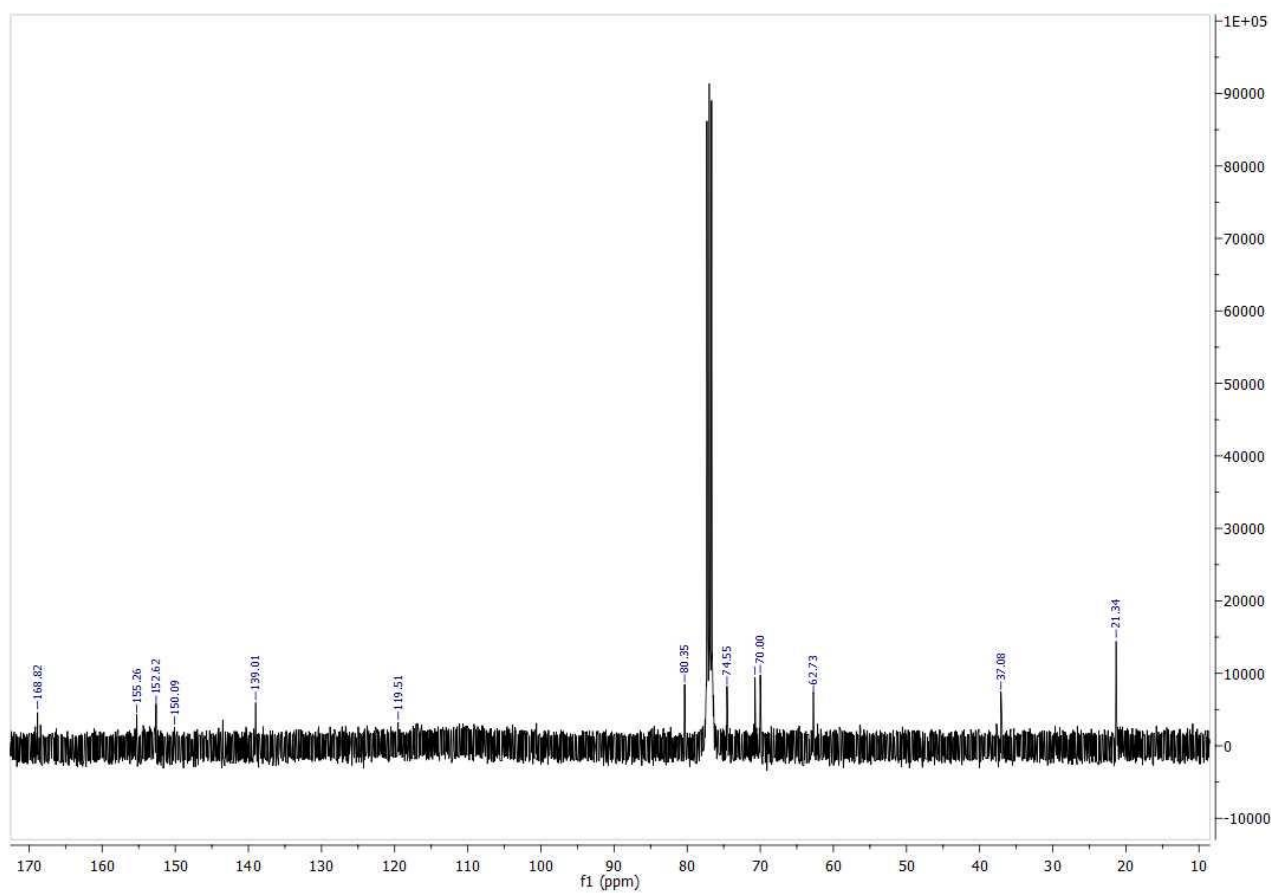

**Figure S6.** <sup>1</sup>H NMR (400 MHz) and <sup>13</sup>C NMR (100 MHz) spectra of compound **10** in CDCl<sub>3</sub>

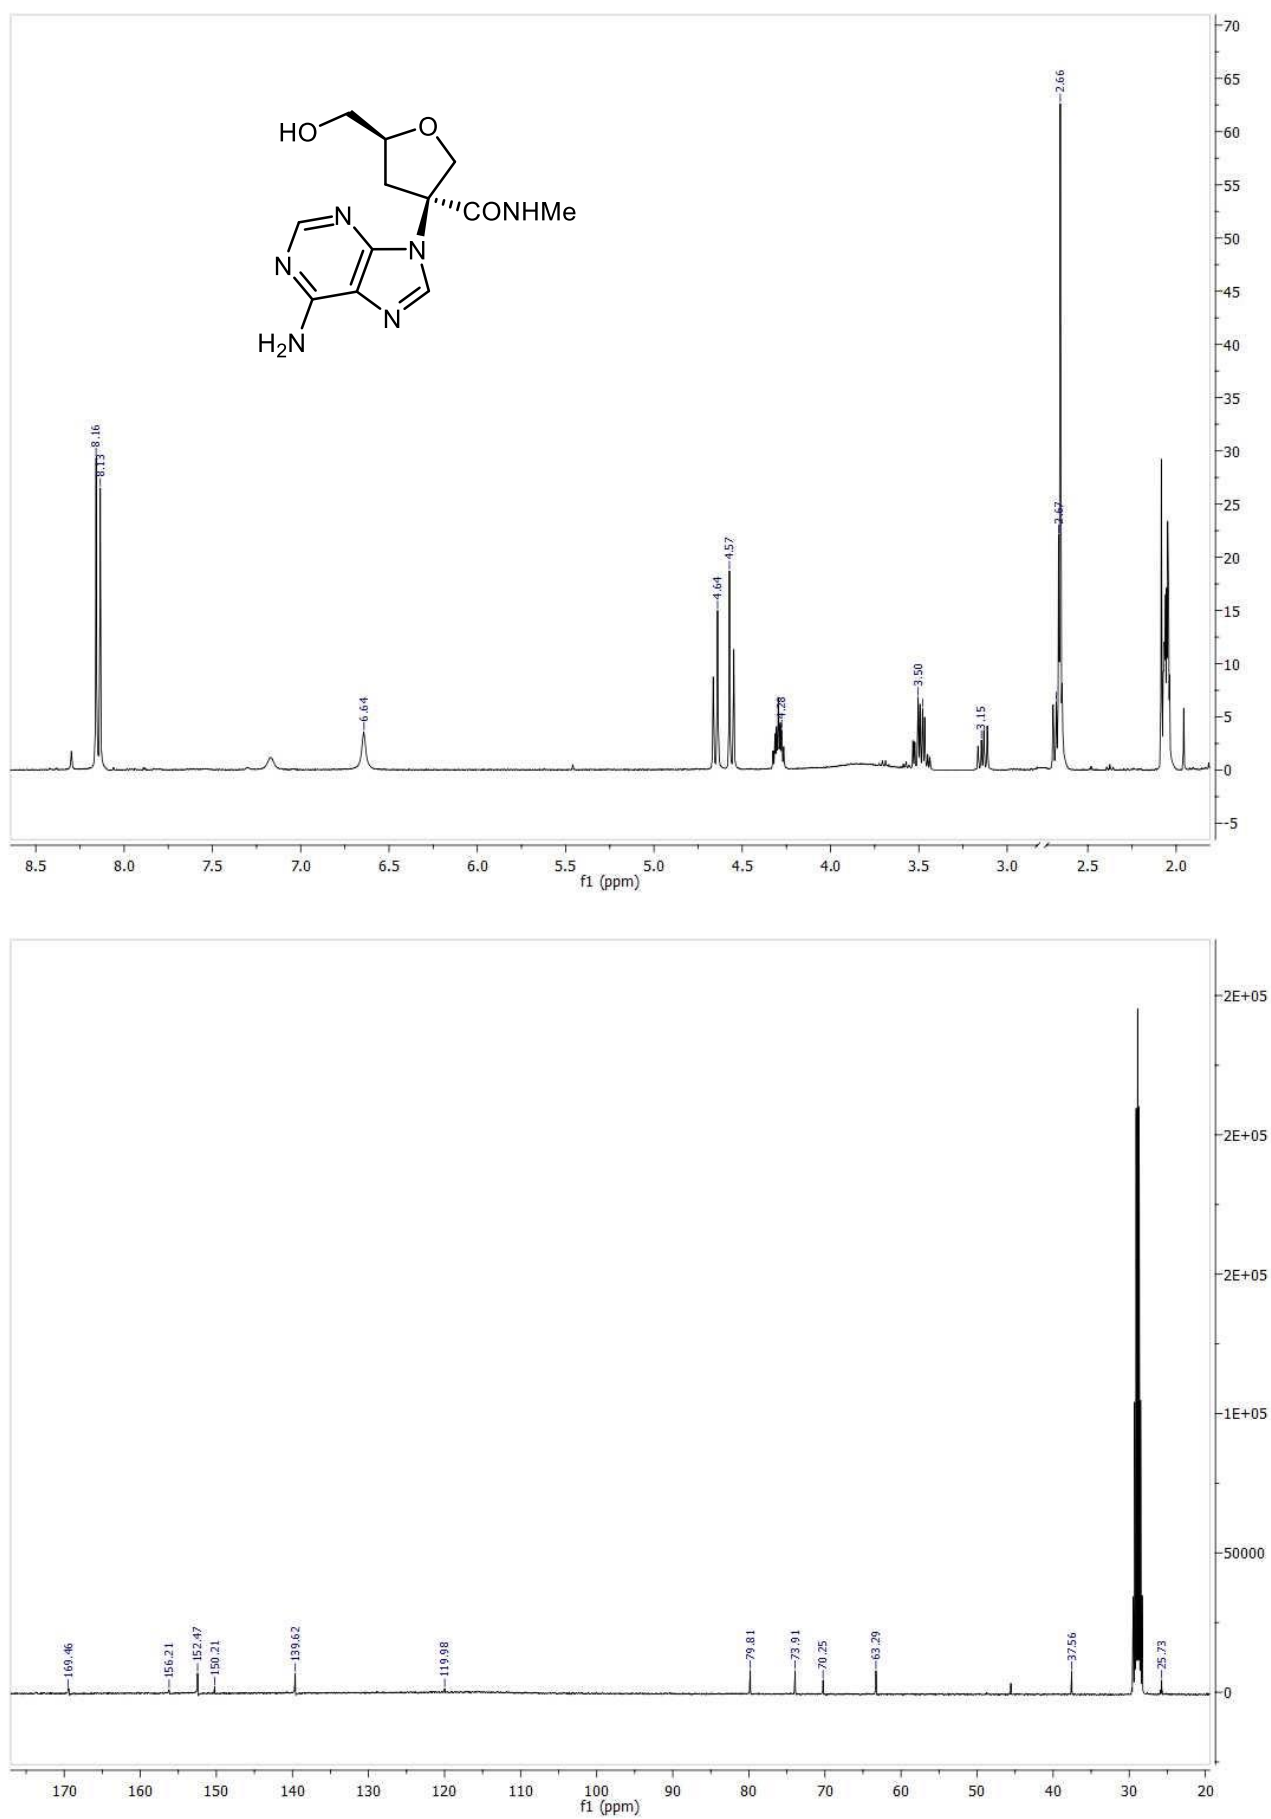

**Figure S7.**  $^1\text{H}$ NMR (400MHz) and  $^{13}\text{C}$ NMR (100MHz) spectra of compound **11** in acetone- $d_6$



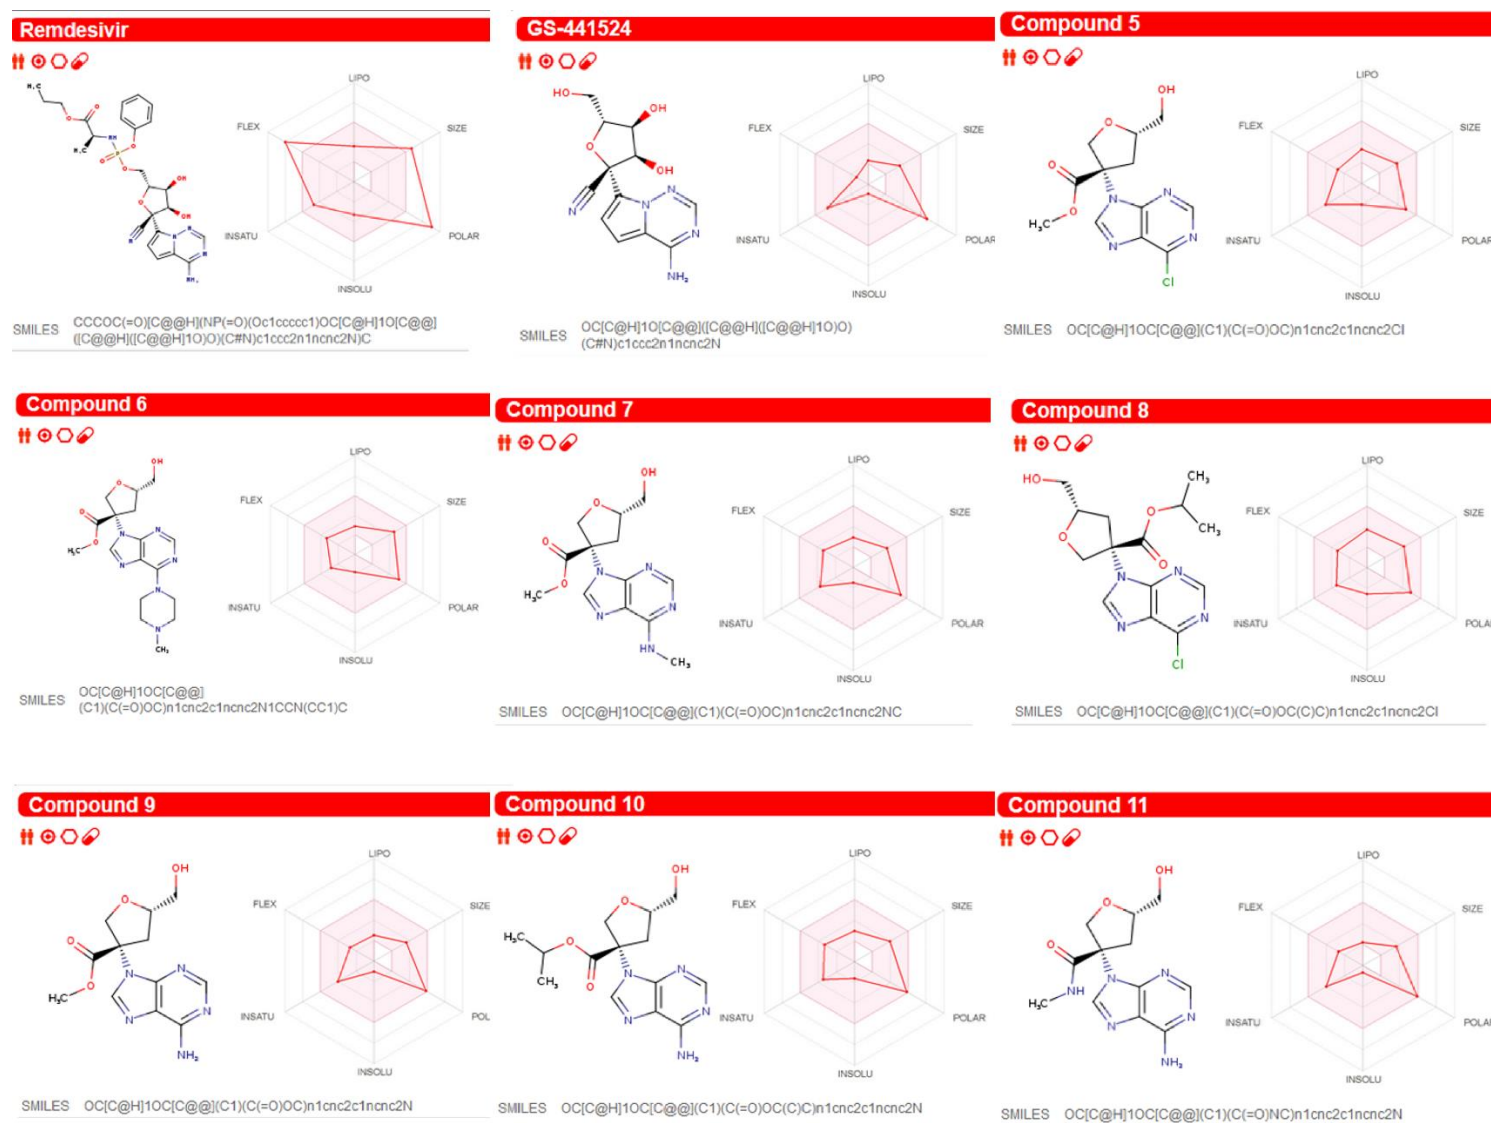

**Figure S8.** Chemical structure and bioavailability radar for compounds 5-11, remdesivir and GS-441524 evaluated by Swiss-ADME.

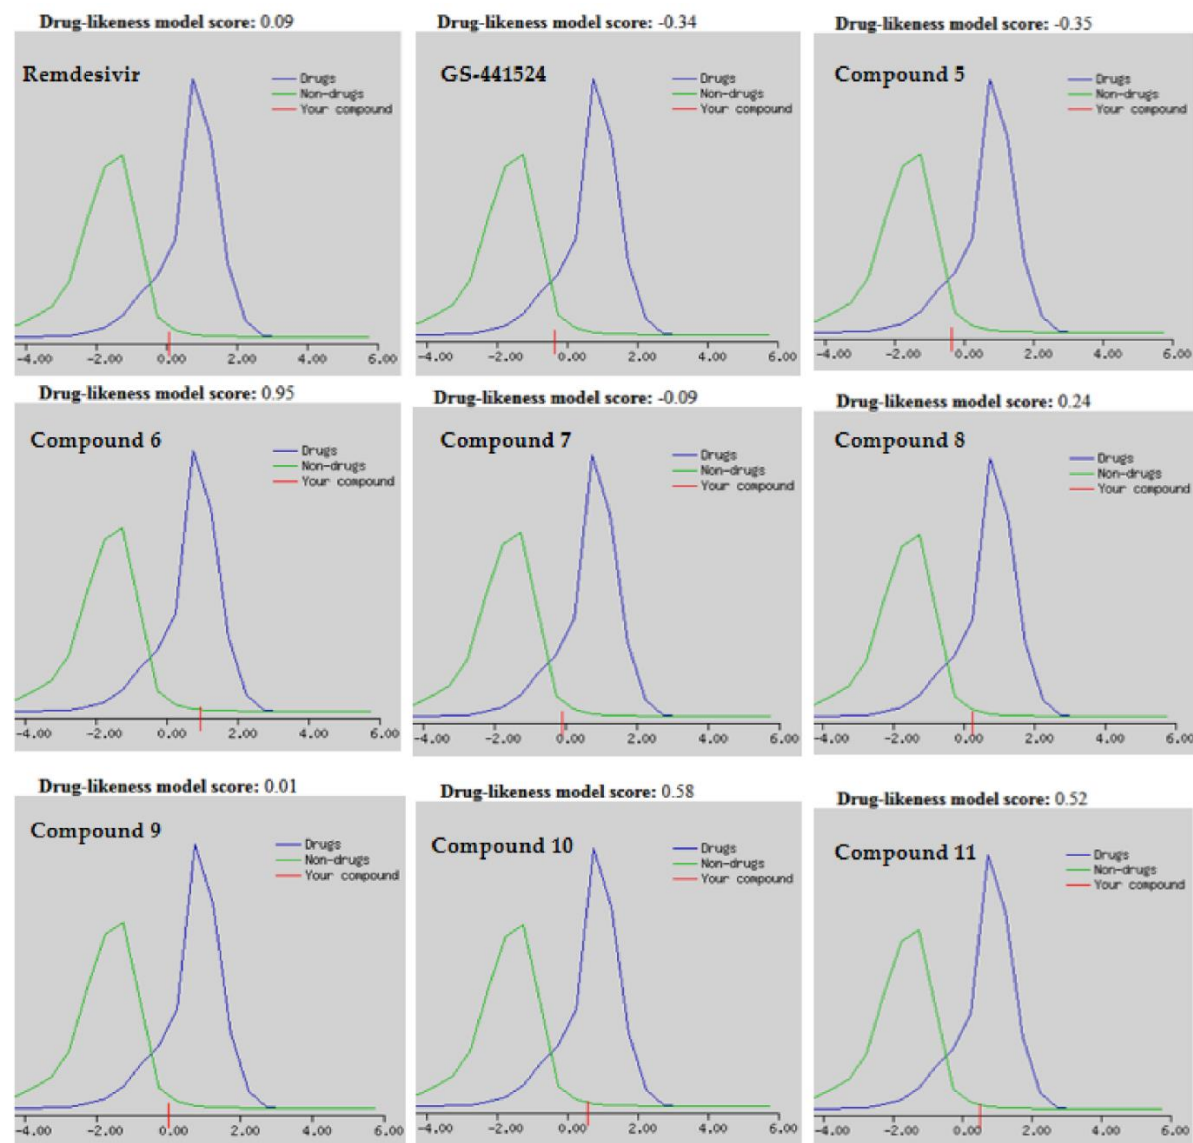

**Figure S9.** Drug-likeness prediction for compounds 5-11, remdesivir and GS-441524 by Molsoft server (<https://molsoft.com/mprop/>)

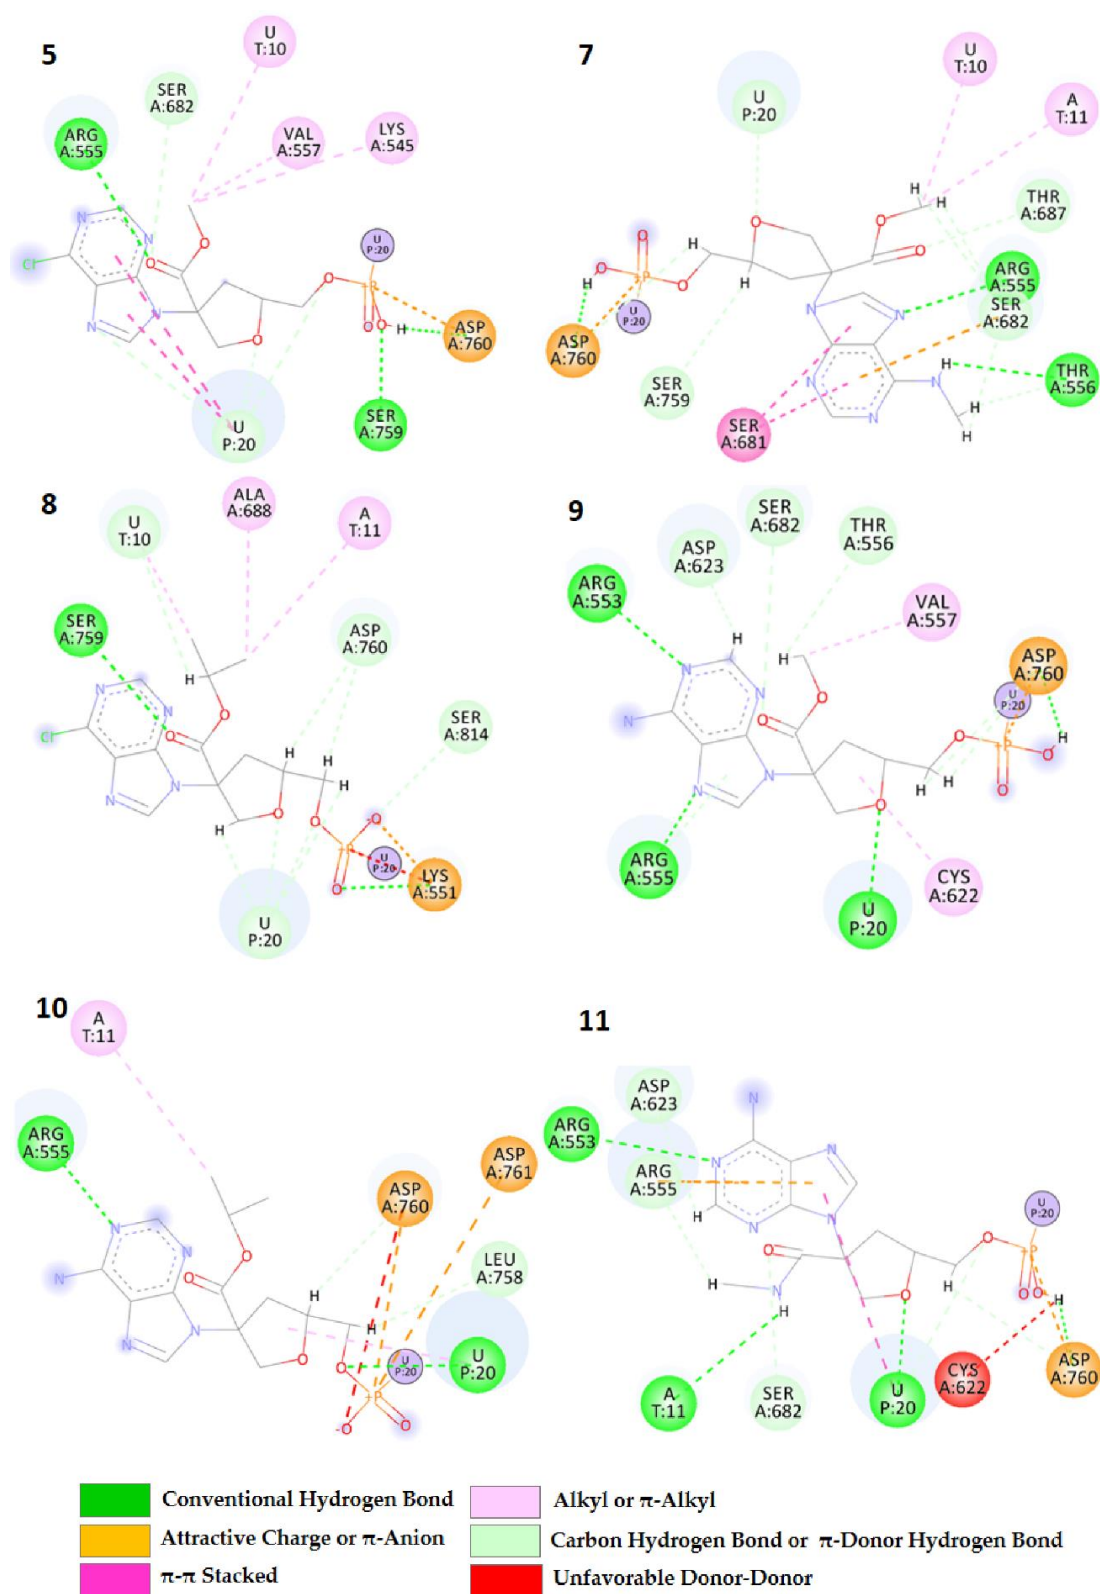

**Figure S10.** Two-dimensional representations for the interactions of compounds 5 and 7-11 linked to RNA in the receptor pocket of free RdRp (7BV2), as deduced by docking calculation.

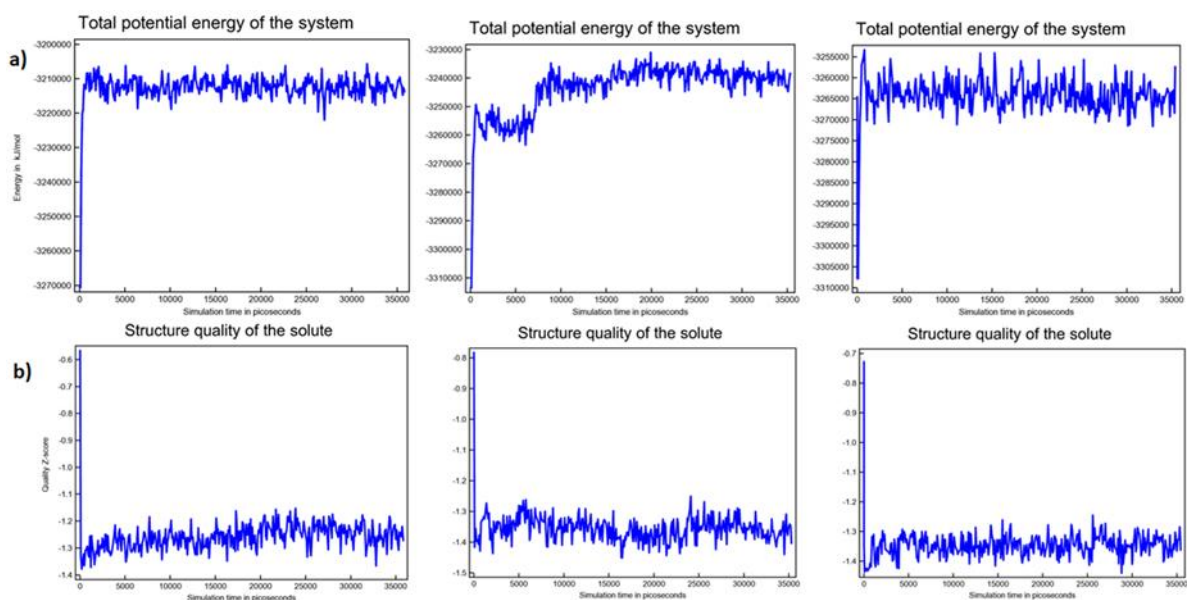

**Figure S11.** Data from MD simulation: (a) total potential energy of the system during all simulation time and (b) quality Z-score of structure for free RdRp on the left, compound 6 at the center and GS-441524 on the right.

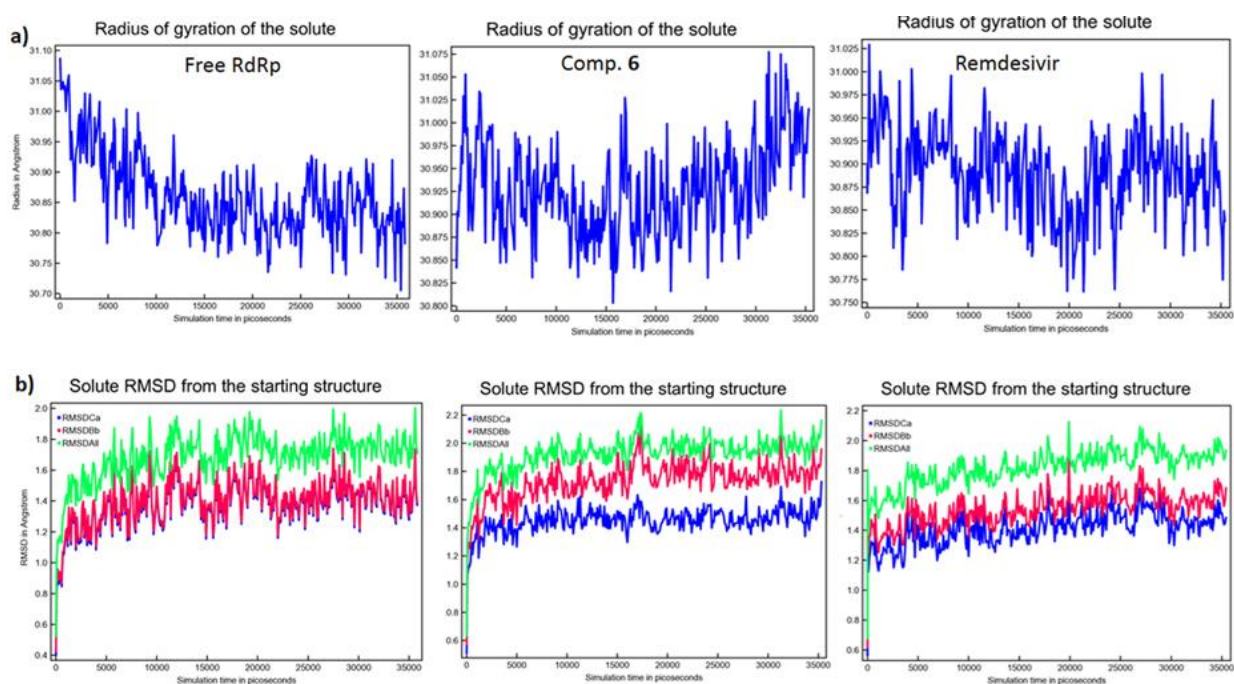

**Figure S12.** Data from MD simulation: (a) radius of gyration (in Å) during all simulation time and (b) RMSD (in Å) from the starting structure (Ca in blu, backbone in red and all heavy atoms in green) for free RdRp on the left, compound 6 at the center and GS-441524 on the right.

**Table S1.** ADME Prediction of compounds **5-11** and reference compounds remdesivir and GS-441524 evaluated by on-line Server Swiss-ADME (<http://www.swissadme.ch/>)

| Molecule                        | Remdesivir                                                      | GS-441524                                                     | 5                                                               | 6                                                             | 7                                                             | 8                                                               | 9                                                             | 10                                                            | 11                                                            |
|---------------------------------|-----------------------------------------------------------------|---------------------------------------------------------------|-----------------------------------------------------------------|---------------------------------------------------------------|---------------------------------------------------------------|-----------------------------------------------------------------|---------------------------------------------------------------|---------------------------------------------------------------|---------------------------------------------------------------|
| <b>Formula</b>                  | C <sub>24</sub> H <sub>29</sub> N <sub>6</sub> O <sub>8</sub> P | C <sub>12</sub> H <sub>13</sub> N <sub>5</sub> O <sub>4</sub> | C <sub>12</sub> H <sub>13</sub> ClN <sub>4</sub> O <sub>4</sub> | C <sub>17</sub> H <sub>24</sub> N <sub>6</sub> O <sub>4</sub> | C <sub>13</sub> H <sub>17</sub> N <sub>5</sub> O <sub>4</sub> | C <sub>14</sub> H <sub>17</sub> ClN <sub>4</sub> O <sub>4</sub> | C <sub>12</sub> H <sub>15</sub> N <sub>5</sub> O <sub>4</sub> | C <sub>14</sub> H <sub>19</sub> N <sub>5</sub> O <sub>4</sub> | C <sub>12</sub> H <sub>16</sub> N <sub>6</sub> O <sub>3</sub> |
| <b>MW</b>                       | 560.50                                                          | 291.26                                                        | 312.71                                                          | 376.41                                                        | 307.31                                                        | 340.76                                                          | 293.28                                                        | 321.33                                                        | 292.29                                                        |
| <b>#Heavy atoms</b>             | 39                                                              | 21                                                            | 21                                                              | 27                                                            | 22                                                            | 23                                                              | 21                                                            | 23                                                            | 21                                                            |
| <b>#Aromatic heavy</b>          | 15                                                              | 9                                                             | 9                                                               | 9                                                             | 9                                                             | 9                                                               | 9                                                             | 9                                                             | 9                                                             |
| <b>Fraction Csp<sup>3</sup></b> | 0.42                                                            | 0.42                                                          | 0.50                                                            | 0.65                                                          | 0.54                                                          | 0.57                                                            | 0.50                                                          | 0.57                                                          | 0.50                                                          |
| <b>#Rotatable bonds</b>         | 12                                                              | 2                                                             | 4                                                               | 5                                                             | 5                                                             | 5                                                               | 4                                                             | 5                                                             | 4                                                             |
| <b>#H-bond acceptors</b>        | 12                                                              | 7                                                             | 7                                                               | 8                                                             | 7                                                             | 7                                                               | 7                                                             | 7                                                             | 6                                                             |
| <b>#H-bond donors</b>           | 4                                                               | 4                                                             | 1                                                               | 1                                                             | 2                                                             | 1                                                               | 2                                                             | 2                                                             | 3                                                             |
| <b>MR</b>                       | 136.01                                                          | 68.48                                                         | 71.74                                                           | 102.99                                                        | 76.03                                                         | 81.35                                                           | 71.13                                                         | 80.75                                                         | 72.85                                                         |
| <b>TPSA</b>                     | 213.36                                                          | 149.92                                                        | 99.36                                                           | 105.84                                                        | 111.39                                                        | 99.36                                                           | 125.38                                                        | 125.38                                                        | 128.18                                                        |
| <b>iLOGP</b>                    | 3.20                                                            | 0.55                                                          | 2.09                                                            | 2.79                                                          | 2.02                                                          | 2.53                                                            | 1.57                                                          | 2.00                                                          | 1.46                                                          |
| <b>XLOGP3</b>                   | 0.76                                                            | -1.41                                                         | 0.26                                                            | -0.43                                                         | -0.38                                                         | 1.06                                                            | -1.05                                                         | -0.25                                                         | -1.63                                                         |
| <b>WLOGP</b>                    | 1.19                                                            | -1.96                                                         | 0.13                                                            | -1.53                                                         | -0.67                                                         | 0.91                                                            | -0.93                                                         | -0.16                                                         | -1.36                                                         |
| <b>MLOGP</b>                    | -0.43                                                           | -1.83                                                         | -0.78                                                           | -0.91                                                         | -1.15                                                         | -0.26                                                           | -1.42                                                         | -0.88                                                         | -1.83                                                         |
| <b>Silicos-IT Log P</b>         | -1.10                                                           | -1.93                                                         | 0.65                                                            | -0.49                                                         | -0.28                                                         | 1.21                                                            | -0.71                                                         | -0.15                                                         | -1.03                                                         |
| <b>Consensus Log P</b>          | 0.72                                                            | -1.32                                                         | 0.47                                                            | -0.11                                                         | -0.09                                                         | 1.09                                                            | -0.51                                                         | 0.11                                                          | -0.88                                                         |
| <b>ESOL Log S</b>               | -3.29                                                           | -0.94                                                         | -2.00                                                           | -1.82                                                         | -1.48                                                         | -2.58                                                           | -1.05                                                         | -1.63                                                         | -0.68                                                         |
| <b>ESOL Solubility</b>          | 2.90e-01                                                        | 3.32e+01                                                      | 3.16e+00                                                        | 5.70e+00                                                      | 1.02e+01                                                      | 8.96e-01                                                        | 2.61e+01                                                      | 7.46e+00                                                      | 6.13e+01                                                      |
| <b>ESOL Solubility</b>          | 5.17e-04                                                        | 1.14e-01                                                      | 1.01e-02                                                        | 1.52e-02                                                      | 3.32e-02                                                      | 2.63e-03                                                        | 8.91e-02                                                      | 2.32e-02                                                      | 2.10e-01                                                      |
| <b>ESOL Class</b>               | Soluble                                                         | Very sol.                                                     | Very sol.                                                       | Very sol.                                                     | Very sol.                                                     | Soluble                                                         | Very sol.                                                     | Very sol.                                                     | Very sol.                                                     |
| <b>Ali Log S</b>                | -4.82                                                           | -1.24                                                         | -1.91                                                           | -1.33                                                         | -1.50                                                         | -2.74                                                           | -1.09                                                         | -1.92                                                         | -0.55                                                         |
| <b>Ali Solubility</b>           | 8.48e-03                                                        | 1.69e+01                                                      | 3.87e+00                                                        | 1.77e+01                                                      | 9.81e+00                                                      | 6.23e-01                                                        | 2.36e+01                                                      | 3.82e+00                                                      | 8.21e+01                                                      |
| <b>Ali Solubility (mol/l)</b>   | 1.51e-05                                                        | 5.80e-02                                                      | 1.24e-02                                                        | 4.70e-02                                                      | 3.19e-02                                                      | 1.83e-03                                                        | 8.04e-02                                                      | 1.19e-02                                                      | 2.81e-01                                                      |
| <b>Ali Class</b>                | Moderately                                                      | Very sol.                                                     | Very sol.                                                       | Very sol.                                                     | Very sol.                                                     | Soluble                                                         | Very sol.                                                     | Very sol.                                                     | Very sol.                                                     |
| <b>Silicos-IT LogSw</b>         | -3.98                                                           | -0.26                                                         | -2.45                                                           | -1.97                                                         | -2.28                                                         | -2.87                                                           | -1.49                                                         | -1.91                                                         | -1.80                                                         |
| <b>Silicos-IT Solubility</b>    | 5.86e-02                                                        | 1.60e+02                                                      | 1.10e+00                                                        | 4.08e+00                                                      | 1.61e+00                                                      | 4.57e-01                                                        | 9.53e+00                                                      | 3.95e+00                                                      | 4.63e+00                                                      |
| <b>Silicos-IT Solubility</b>    | 1.04e-04                                                        | 5.48e-01                                                      | 3.52e-03                                                        | 1.08e-02                                                      | 5.25e-03                                                      | 1.34e-03                                                        | 3.25e-02                                                      | 1.23e-02                                                      | 1.58e-02                                                      |
| <b>Silicos-IT class</b>         | Soluble                                                         | Soluble                                                       | Soluble                                                         | Soluble                                                       | Soluble                                                       | Soluble                                                         | Soluble                                                       | Soluble                                                       | Soluble                                                       |
| <b>GI absorption</b>            | Low                                                             | Low                                                           | High                                                            | High                                                          | High                                                          | High                                                            | High                                                          | High                                                          | Low                                                           |
| <b>BBB permeant</b>             | No                                                              | No                                                            | No                                                              | No                                                            | No                                                            | No                                                              | No                                                            | No                                                            | No                                                            |
| <b>Pgp substrate</b>            | Yes                                                             | No                                                            | No                                                              | Yes                                                           | No                                                            | No                                                              | No                                                            | Yes                                                           | No                                                            |



| Molecule              | Remdesivir | GS-441524 | 5     | 6     | 7     | 8     | 9     | 10    | 11    |
|-----------------------|------------|-----------|-------|-------|-------|-------|-------|-------|-------|
| CYP1A2 inhibitor      | No         | No        | Yes   | Yes   | Yes   | Yes   | Yes   | No    | Yes   |
| CYP2C19 inhibitor     | No         | No        | No    | No    | No    | No    | No    | No    | No    |
| CYP2C9 inhibitor      | No         | No        | No    | No    | No    | No    | No    | No    | No    |
| CYP2D6 inhibitor      | No         | No        | No    | No    | No    | No    | No    | No    | No    |
| CYP3A4 inhibitor      | Yes        | No        | No    | No    | No    | No    | No    | No    | No    |
| log Kp (cm/s)         | -9.18      | -9.08     | -8.02 | -8.90 | -8.44 | -7.63 | -8.83 | -8.44 | -9.24 |
| Lipinski #violations  | 2          | 0         | 0     | 0     | 0     | 0     | 0     | 0     | 0     |
| Ghose #violations     | 2          | 1         | 0     | 1     | 1     | 0     | 1     | 0     | 1     |
| Veber #violations     | 2          | 1         | 0     | 0     | 0     | 0     | 0     | 0     | 0     |
| Egan #violations      | 1          | 1         | 0     | 0     | 0     | 0     | 0     | 0     | 0     |
| Muegge #violations    | 2          | 0         | 0     | 0     | 0     | 0     | 0     | 0     | 0     |
| Bioavailability Score | 0.17       | 0.55      | 0.55  | 0.55  | 0.55  | 0.55  | 0.55  | 0.55  | 0.55  |
| Synthetic             | 5.96       | 3.89      | 3.44  | 4.17  | 3.73  | 3.67  | 3.57  | 3.80  | 3.48  |
